# Supplementary material
Source: HighWire-hosted journal article supplement (https://diabetes.diabetesjournals.org/content/suppl/2005/11/28/54.12.3560)
Supplement: pg3560TableAppendix.pdf [file pg3560TableAppendix.pdf]

TABLE 1. Sequences of primers used for screening and genotyping of gene polymorphisms.

| Primer name        | Primer sequence                | Product size | Taq polymerase | Annealing temperature |
|--------------------|--------------------------------|--------------|----------------|-----------------------|
| Promoter-1 Forward | 5'-GACTCAGGAAAATCAATTCTTAC-3'  | 720bp        | AmpliTaq       | 55 °C                 |
| Promoter-1 Reverse | 5'-CAGAAACACTGGAAGCCAATGGAT-3' |              | Gold           |                       |
| Promoter-2 Forward | 5'-GCACTGGTGCTGAGAGATGGAGA-3'  | 641bp        | AmpliTaq       | 55 °C                 |
| Promoter-2 Reverse | 5'-TATTTTCATTTACTTGCATTAAGC-3' |              | Gold           |                       |
| Promoter-3 Forward | 5'-GCAATATATAACCACATAAGGTA-3'  | 629bp        | AmpliTaq       | 55 °C                 |
| Promoter-3 Reverse | 5'-CTTTATTTTCAGAGGATTGCTAGT-3' |              | Gold           |                       |
| Promoter-4 Forward | 5'-ACAATGACTCTTTTGAAATGCCT-3'  | 591bp        | AmpliTaq       | 55 °C                 |
| Promoter-4 Reverse | 5'-TGAGAGGGTGCCTGGAAACTAATC-3' |              | Gold           |                       |
